# Supplementary material for: Synthesis of ZnO Nanorod Film Deposited by Spraying with Application for Flexible Piezoelectric Energy Harvesting Microdevices
Source: Sensors (Basel). 2020 Nov 26;20(23):6759. doi: 10.3390/s20236759 (PMC7729474; doi:10.3390/s20236759)
Supplement: Supplementary file 1 [file sensors-20-06759-s001.zip]

Archive with 4 entries (4 files):
- sensors-974498-supplementary.pdf
- Video 1.mp4
- Video 2.mp4
- Videos description.docx
